# Supplementary material for: A novel strategy for low-temperature synthesis of Ruddlesden–Popper type layered perovskite La3Mn2O7+δ for methane combustion
Source: Royal Society of Chemistry journal article supplement (doi:10.1039/c3ta11129f), 2013-01-01
Supplement: c3ta11129f.pdf [file c3ta11129f.pdf]

## Supplementary Information

### A novel strategy for low-temperature synthesis of Ruddlesden-Popper type layered perovskite $\text{La}_3\text{Mn}_2\text{O}_{7+\delta}$ for methane combustion

Xiaorui Du,<sup>ab</sup> Guojun Zou,<sup>\*a</sup> Yan Zhang<sup>a</sup> and Xiaolai Wang<sup>\*a</sup>

<sup>a</sup> State Key Laboratory for Oxo Synthesis and Selective Oxidation, Lanzhou Institute of Chemical Physics, Chinese Academy of Sciences, Lanzhou, 730000, China. E-mail: zougj@licp.cas.cn, xlwanglicp@yahoo.com.cn; Fax: +86-931-8277088

<sup>b</sup> Graduate University of Chinese Academy of Sciences, Beijing, 100049, China

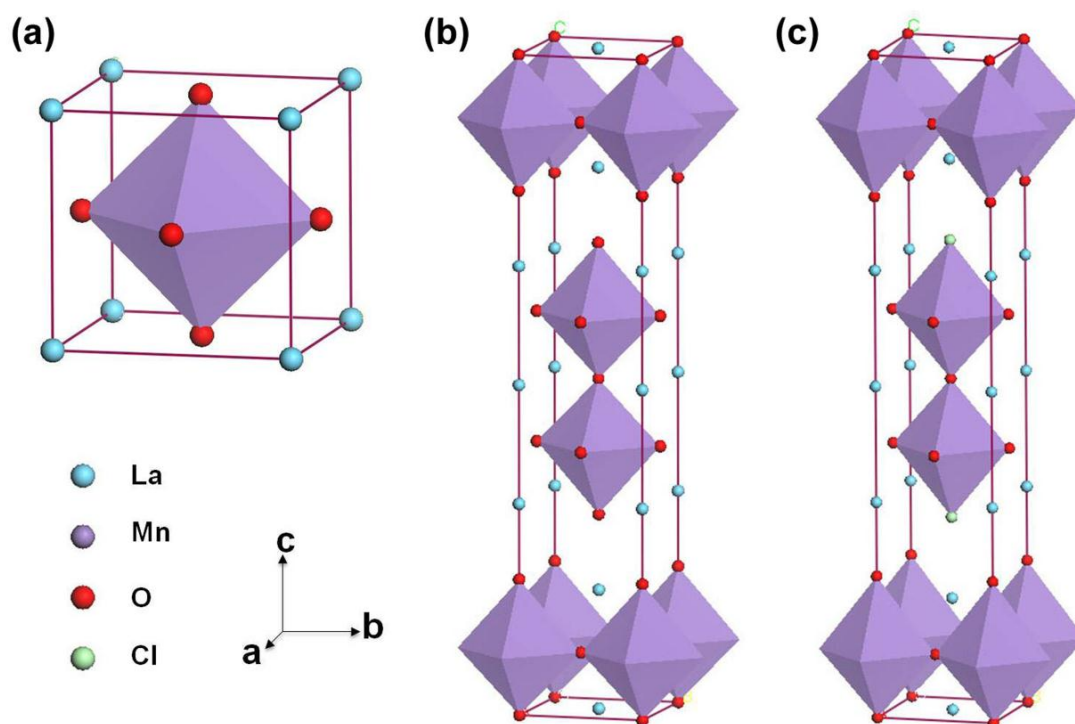

**Figure S1.** The spin-polarized density functional theory (DFT) calculation simulation pictures:

(a) the 5-atom  $\text{LaMnO}_3$  unit cell (space group:  $Pm\bar{3}m$ ), (b) the modeled 24-atom  $\text{La}_3\text{Mn}_2\text{O}_7$  unit cell (space group:  $I4/mmm$ ), and (c) the modeled Cl doped  $\text{La}_3\text{Mn}_2\text{O}_6\text{Cl}$ .

**Table S1.** The Miller indices corresponding to the X-ray diffraction peaks of LLM-700

| $2\theta$ (degree) | $d_{\text{exp}}^a$ (Å) | Miller                        | $d_{\text{cal}}^c$ (Å) |
|--------------------|------------------------|-------------------------------|------------------------|
|                    |                        | Indices<br>(hkl) <sup>b</sup> |                        |
| 15.733             | 5.6278                 | (0 0 4)                       | 5.6279                 |
| 22.992             | 3.8648                 | (1 0 0)                       | 3.8710                 |
| 25.822             | 3.4473                 | (1 0 3)                       | 3.4402                 |
| 28.039             | 3.1795                 | (1 0 4)                       | 3.1894                 |
| 30.307             | 2.9466                 | (1 0 5)                       | 2.9353                 |
| 32.683             | 2.7376                 | (1 1 0)                       | 2.7372                 |
| 40.206             | 2.2410                 | (1 0 8)                       | 2.2761                 |
| 40.751             | 2.2123                 | (1 1 6)                       | 2.2113                 |
| 46.890             | 1.9359                 | (2 0 0)                       | 1.9355                 |
| 48.624             | 1.8709                 | (2 0 3)                       | 1.8742                 |
| 52.674             | 1.7362                 | (2 1 0)                       | 1.7312                 |
| 55.105             | 1.6652                 | (2 1 4)                       | 1.6547                 |
| 58.016             | 1.5884                 | (2 1 5)                       | 1.6158                 |
| 58.665             | 1.5723                 | (2 1 6)                       | 1.5719                 |
| 68.187             | 1.3741                 | (2 2 0)                       | 1.3686                 |
| 68.756             | 1.3641                 | (2 2 1)                       | 1.3661                 |
| 73.232             | 1.2914                 | (3 0 0)                       | 1.2903                 |
| 78.177             | 1.2216                 | (3 1 1)                       | 1.2223                 |
| 82.527             | 1.1679                 | (2 2 10)                      | 1.1694                 |
| 86.729             | 1.1218                 | (2 2 11)                      | 1.1377                 |

<sup>a</sup> The experimental  $d$  values.

<sup>b</sup> The calculated Miller indices based on the  $d_{\text{exp}}$  values and the lattice spacing formula. The space group was initially set to be  $I4/mmm$ , and the lattice spacing formula was

$$\frac{1}{d^2} = \frac{h^2 + k^2}{a^2} + \frac{l^2}{c^2}. \text{ The peaks at } 2\theta = 15.733^\circ, 32.683^\circ \text{ were initially assigned to the}$$

(004) and (110) planes, respectively, and the preliminary lattice parameters  $a = b = 3.871 \text{ \AA}$ , and  $c = 22.5116 \text{ \AA}$  were consequently calculated.

<sup>c</sup> The quasi  $d$  values calculated in turn based on the obtained lattice parameters and Miller indices.

The  $d_{\text{cal}}$  values were consistent with the  $d_{\text{exp}}$  values substantially, demonstrating that the space group and lattice parameter were set appropriately. The slight differences between  $d_{\text{cal}}$  and  $d_{\text{exp}}$  values may have resulted from the lattice distortion in LLM-700.

**Table S2.** The ICP-MS results of the LLM-700 sample.

|                | La <sup>b</sup> | Mn <sup>b</sup> | O <sup>c</sup> |
|----------------|-----------------|-----------------|----------------|
| Wt.%           | 63.74           | 17.05           | 19.21          |
| n <sup>a</sup> | 3               | 2.03            | 7.85           |

<sup>a</sup> The atomic ratio of elements La, Mn and O.

<sup>b</sup> Experimental values of elements La and Mn measured by inductively coupled plasma-mass spectrometry (ICP-MS).

<sup>c</sup> The calculated value determined from the experimental values of elements La and Mn.

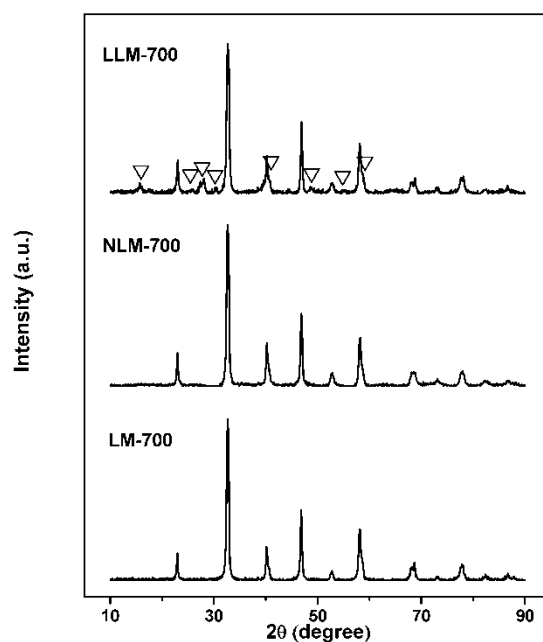

**Figure S2.** X-ray diffraction (XRD) patterns of the conventional LaMnO<sub>3</sub> calcined at 700 °C

(LM-700), the sample with a nominal composition of La<sub>3</sub>Mn<sub>2</sub>O<sub>7+δ</sub> calcined at 700 °C

(NLM-700), and the R-P type layered perovskite samples calcined at 700 °C (LLM-700); (▽)

the typical peaks of the LLM-700 sample.

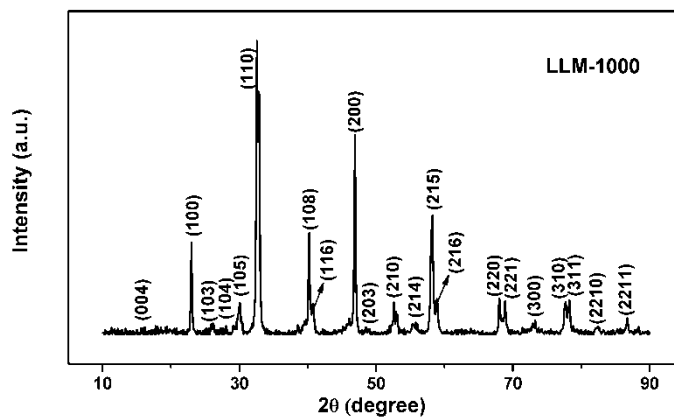

**Figure S3.** X-ray diffraction (XRD) pattern of the R-P type layered perovskite samples calcinated at 1000 °C (LLM-1000).

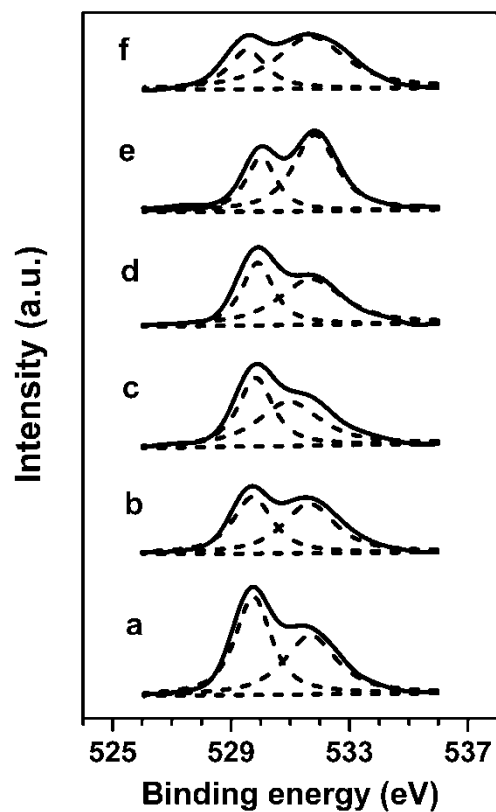

**Figure S4.** O1s XPS profiles of different catalysts: (a) LLM-700, (b) LLM-1000, (c) LM-700, (d) LM-1000, (e) NLM-700, and (f) LLMCl-700. The binding energy of 529 to 530 eV is characteristic of the lattice oxygen ( $O^{2-}$ , denoted as  $O_{\alpha}$ ), and the binding energy of 531 to 532 eV might be assigned to adsorbed surface oxygen ions with low coordination (denoted as  $O_{\beta}$ ).
